# Supplementary material for: Gas–solid two-phase flow method for preparing trimesic acid series MOFs for catalytic thermal decomposition of ammonium perchlorate
Source: Royal Society of Chemistry journal article supplement (doi:10.1039/d2dt02303b), 2022-01-01
Supplement: d2dt02303b1.pdf [file d2dt02303b1.pdf]

## Support Information

The following are the detailed parameters of Zn-BTC, Co-BTC, and Zn-Co-BTC single crystals, in which Tables S3-1, S3-4, and S3-7 are crystal parameters, tables S3-2, S3-5, S3-8 and S3-3, S3-6, S3-9 are the intramolecular selective bond lengths and bond angles, respectively.

**Table S3-1 Zn-BTC Crystal parameters**

| Formula                                 | $C_{93}H_{92}Zn_{13}N_7O_{66}$   |
|-----------------------------------------|----------------------------------|
| M/g·mol <sup>-1</sup>                   | 3213.54                          |
| T/K                                     | 193 K                            |
| Crystal system                          | orthorhombic                     |
| Space group                             | Cmc21                            |
| a/Å                                     | 29.577(8)                        |
| b/Å                                     | 28.974(8)                        |
| c/Å                                     | 17.758(5)                        |
| $\alpha/^\circ$                         | 90                               |
| $\beta/^\circ$                          | 90                               |
| $\gamma/^\circ$                         | 90                               |
| Volume/Å <sup>3</sup>                   | 15218(7)                         |
| Z                                       | 4                                |
| $\rho_{\text{calc}}/\text{g/cm}^3$      | 1.403                            |
| Crystal size/mm <sup>3</sup>            | 0.10 × 0.10 × 0.11               |
| Reflections collected                   | 2520                             |
| Final R indexes [ $I \geq 2\sigma(I)$ ] | $R_1 = 0.0567$ , $wR_2 = 0.3494$ |
| Final R indexes [all data]              | $R_1 = 0.0503$ , $wR_2 = 0.1518$ |
| Refinement                              | SHELXL-97                        |

**Table S3-2 Selective bond lengths in Zn-BTC molecules**

| Atom | Atom | Length/Å | Atom | Atom | Length/Å |
|------|------|----------|------|------|----------|
| Zn7  | O30  | 2.089(7) | Zn4  | O10  | 2.136(7) |
| Zn7  | O31  | 2.058(9) | Zn4  | O12  | 2.064(6) |
| Zn1  | O17  | 2.171(6) | Zn5  | O24  | 1.945(6) |
| Zn1  | O3   | 2.098(5) | Zn5  | O16  | 1.991(6) |

**Table S3-3 Selective bond angles in Zn-BTC molecules**

| Atom | Atom | Atom | Angle/°  | Atom | Atom | Atom | Angle/°  |
|------|------|------|----------|------|------|------|----------|
| O30  | Zn7  | O23  | 89.4(2)  | O23  | Zn7  | O28  | 89.5(3)  |
| O30  | Zn7  | O28  | 92.5(2)  | O28  | Zn7  | O28  | 85.1(5)  |
| O30  | Zn7  | O30  | 176.4(4) | O3   | Zn1  | O17  | 91.8(2)  |
| O31  | Zn7  | O23  | 88.2(3)  | O5   | Zn1  | O17  | 175.2(2) |
| O31  | Zn7  | O28  | 90.2(3)  | O5   | Zn1  | O3   | 92.8(2)  |
| O23  | Zn7  | O23  | 95.9(4)  | O25  | Zn1  | O17  | 87.5(3)  |

**Table S3-4 Co-BTC Crystal parameters**

| Formula               | C <sub>45</sub> H <sub>51</sub> Co <sub>3</sub> N <sub>6</sub> O <sub>24</sub> |
|-----------------------|--------------------------------------------------------------------------------|
| M/g·mol <sup>-1</sup> | 1236.71                                                                        |
| T/K                   | 296 K                                                                          |
| Crystal system        | monoclinic                                                                     |
| Space group           | P /21n                                                                         |
| a/Å                   | 16.6590(6)                                                                     |
| b/Å                   | 14.1439(5)                                                                     |
| c/Å                   | 28.8454(10)                                                                    |
| α/°                   | 90                                                                             |
| β/°                   | 90                                                                             |

|                                         |                                  |
|-----------------------------------------|----------------------------------|
| $\gamma/^\circ$                         | 90                               |
| Volume/ $\text{\AA}^3$                  | 6796.6(4)                        |
| Z                                       | 4                                |
| $\rho_{\text{calc}}/\text{g/cm}^3$      | 1.209                            |
| Crystal size/ $\text{mm}^3$             | $0.11 \times 0.12 \times 0.11$   |
| Reflections collected                   | 1520                             |
| Final R indexes [ $I \geq 2\sigma(I)$ ] | $R_1 = 0.1353$ , $wR_2 = 0.3494$ |
| Final R indexes [all data]              | $R_1 = 0.0503$ , $wR_2 = 0.1518$ |
| Refinement                              | SHELXL-97                        |

**Table S3-5 Selective bond lengths in Co-BTC molecules**

| Atom | Atom | Length/ $\text{\AA}$ | Atom | Atom | Length/ $\text{\AA}$ |
|------|------|----------------------|------|------|----------------------|
| Co1  | O2   | 2.361(13)            | C1   | O2   | 1.23(2)              |
| Co1  | O11  | 2.341(13)            | C1   | O1   | 1.28(2)              |
| Co1  | O9   | 2.460(12)            | C1   | C2   | 1.56(3)              |
| Co1  | O8   | 2.484(13)            | C2   | C3   | 1.39(6)              |

**Table S3-6 Selective bond angles in Co-BTC molecules**

| Atom | Atom | Atom | Angle/ $^\circ$ | Atom | Atom | Atom | Angle/ $^\circ$ |
|------|------|------|-----------------|------|------|------|-----------------|
| O2   | Co1  | O11  | 72.3(5)         | O2   | Co1  | O12  | 72.7(4)         |
| O2   | Co1  | O9   | 138.7(4)        | O11  | Co1  | O12  | 72.9(4)         |
| O11  | Co1  | O9   | 72.7(5)         | O9   | Co1  | O12  | 76.7(4)         |
| O2   | Co1  | O8   | 132.8(5)        | O8   | Co1  | O12  | 138.3(4)        |
| O11  | Co1  | O8   | 139.2(5)        | O2   | Co1  | O7   | 72.6(4)         |
| O9   | Co1  | O8   | 88.5(4)         | O11  | Co1  | O7   | 144.5(5)        |

**Table S3-7 Zn-Co-BTC Crystal parameters**

|                                         |                                         |
|-----------------------------------------|-----------------------------------------|
| Formula                                 | $C_{102}H_{117}Co_2Zn_{12}N_{10}O_{74}$ |
| M/g·mol <sup>-1</sup>                   | 3569.35                                 |
| T/K                                     | 296                                     |
| Crystal system                          | orthorhombic                            |
| Space group                             | Cmc21                                   |
| a/Å                                     | 29.4994(10)                             |
| b/Å                                     | 28.8734(9)                              |
| c/Å                                     | 17.7149(6)                              |
| $\alpha/^\circ$                         | 90                                      |
| $\beta/^\circ$                          | 90                                      |
| $\gamma/^\circ$                         | 90                                      |
| Volume/Å <sup>3</sup>                   | 15088.6(9)                              |
| Z                                       | 4                                       |
| $\rho_{calc}/cm^3$                      | 1.571                                   |
| Crystal size/mm <sup>3</sup>            | 0.10 × 0.12 × 0.12                      |
| Reflections collected                   | 17235                                   |
| Final R indexes [ $I \geq 2\sigma(I)$ ] | $R_1 = 0.0517$ , $wR_2 = 0.1393$        |
| Final R indexes [all data]              | $R_1 = 0.0503$ , $wR_2 = 0.1818$        |
| Refinement                              | SHELXL-97                               |

**Table S3-8 Selective bond lengths in Zn-Co-BTC molecules**

| Atom | Atom | Length/Å  | Atom | Atom | Length/Å |
|------|------|-----------|------|------|----------|
| Zn1  | O5   | 1.827(7)  | Zn2  | O1   | 2.099(6) |
| Zn1  | O7   | 2.055(8)  | Zn2  | O8   | 2.083(7) |
| Zn1  | O8   | 1.990(7)  | Zn2  | O9   | 2.053(8) |
| Zn1  | O11  | 1.968(14) | Zn2  | O10  | 2.083(5) |

**Table S3-9 Selective bond angles in Zn-Co-BTC molecules**

| Atom | Atom | Atom | Angle/°   | Atom | Atom | Atom | Angle/°  |
|------|------|------|-----------|------|------|------|----------|
| O5   | Zn1  | Zn1  | 107.4(3)  | O8   | Zn1  | O7   | 116.9(3) |
| O5   | Zn1  | O7   | 102.8(3)  | O11  | Zn1  | Zn1  | 146.0(4) |
| O5   | Zn1  | O8   | 127.7(3)  | O11  | Zn1  | O7   | 91.8(7)  |
| O5   | Zn1  | O11  | 105.9(5)  | O11  | Zn1  | O8   | 105.4(5) |
| O7   | Zn1  | Zn1  | 74.1(3)   | O1   | Zn2  | O1   | 83.7(4)  |
| O8   | Zn1  | Zn1  | 58.01(13) | O8   | Zn2  | O1   | 92.4(2)  |

Figure S1(a) (b) (c) (d) were the relationship between the decomposition temperature and the heating rate of pure AP and after adding 10 wt.% catalysts Zn-BTC, Co-BTC, Zn-Co-BTC respectively. The corresponding activation energies can be calculated.

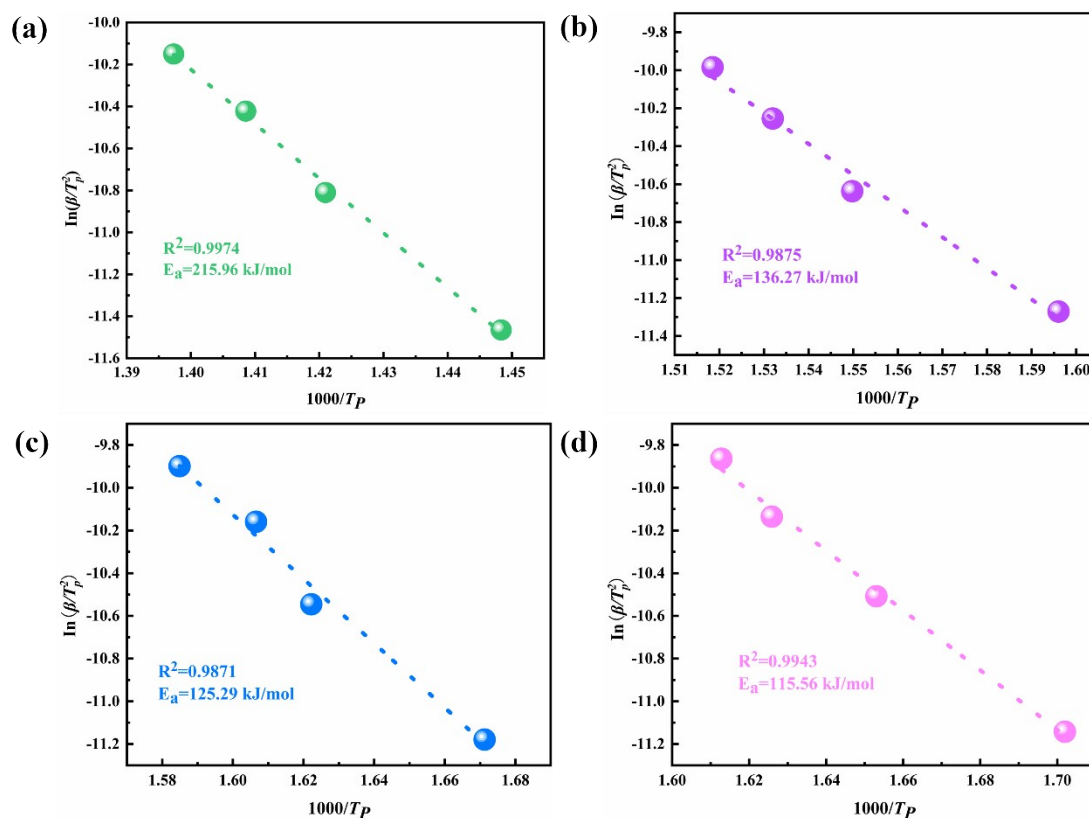

**Fig.S1 (a) Dependence of  $\ln(\beta/T_p^2)$  on  $1000/T_p$  during AP decomposition; (b-d) Dependence of  $\ln(\beta/T_p^2)$  on  $1000/T_p$  during AP decomposition with the addition of Zn-BTC Co-BTC and Zn-Co-BTC (at 10 wt.% mass basis)**
